# Supplementary material for: Effective SERS method for identification of dexmedetomidine hydrochloride in biological samples
Source: Royal Society of Chemistry journal article supplement (doi:10.1039/d0ay00019a), 2020-01-01
Supplement: d0ay00019a1.pdf [file d0ay00019a1.pdf]

## Supporting Information

### Effective SERS method for identification of Dexmedetomidine Hydrochloride in biological samples

*Siqingaowa Han<sup>1,2</sup>, Chen Zhang<sup>1</sup>, Xuanyu Sha<sup>1</sup>, Nan Li<sup>1</sup>, Wuliji Hasi<sup>1,\*</sup>, Yanhua Zhang<sup>3,\*</sup>*

<sup>1</sup>National Key Laboratory of Science and Technology on Tunable Laser, Harbin Institute of Technology, Harbin, 150080, P. R. China.

<sup>2</sup>Affiliated Hospital, Inner Mongolia University for the Nationalities, Inner Mongolia Tongliao 028007, P. R. China.

<sup>3</sup>The Second Affiliated Hospital of Harbin Medical University, Harbin 150001, P. R. China.

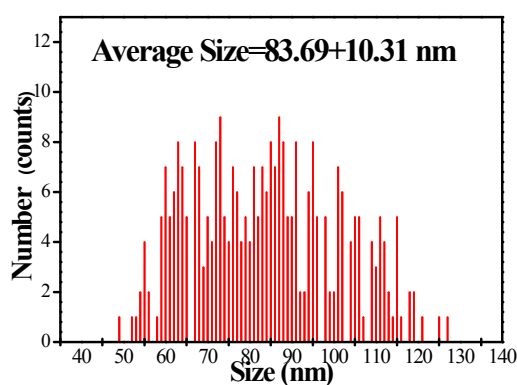

Figure S1 The histogram of particle size distribution of Ag nanoparticles.

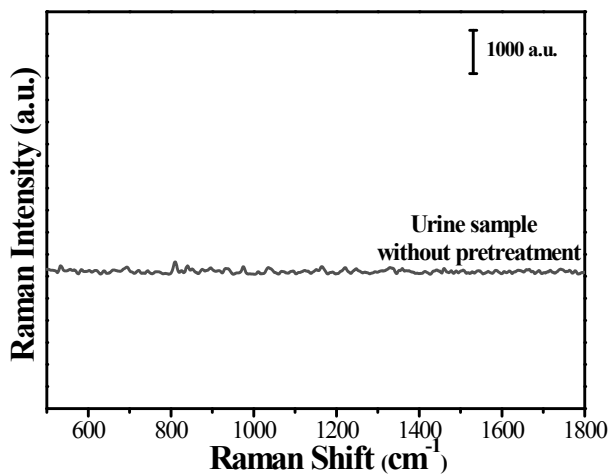

Figure S2 SERS spectrum of DH in urine without any pretreatment.

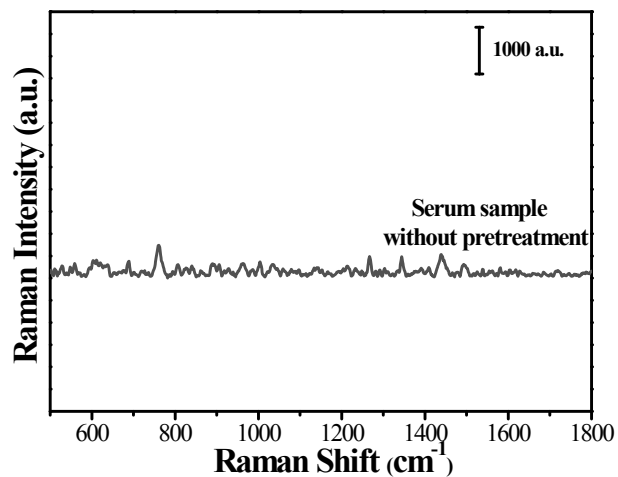

Figure S3 SERS spectrum of DH in serum without any pretreatment.

Table S1 The sensitivity comparison of different methods for the detection of DH molecule.

| Methods                                       | Sensitivity                                                                                         |
|-----------------------------------------------|-----------------------------------------------------------------------------------------------------|
| High performance Liquid Chromatography (HPLC) | 0.004 $\mu\text{g/mL}$ (aqueous solution)                                                           |
| Gas Chromatography-Mass Spectrometer (GC-MS)  | 0.0028 $\mu\text{g/mL}$ (aqueous solution)                                                          |
| SERS                                          | 1 $\mu\text{g/mL}$ (aqueous solution)<br>10 $\mu\text{g/mL}$ (urine)<br>12 $\mu\text{g/mL}$ (serum) |
